# Supplementary material for: The leptin sensitizer celastrol reduces age‐associated obesity and modulates behavioral rhythms
Source: PubMed Central journal article supplement (PMC6516176; doi:10.1111/acel.12874), 2019-03-01

# Supplementary Figure 1. Effect of celastrol on glucose homeostasis.

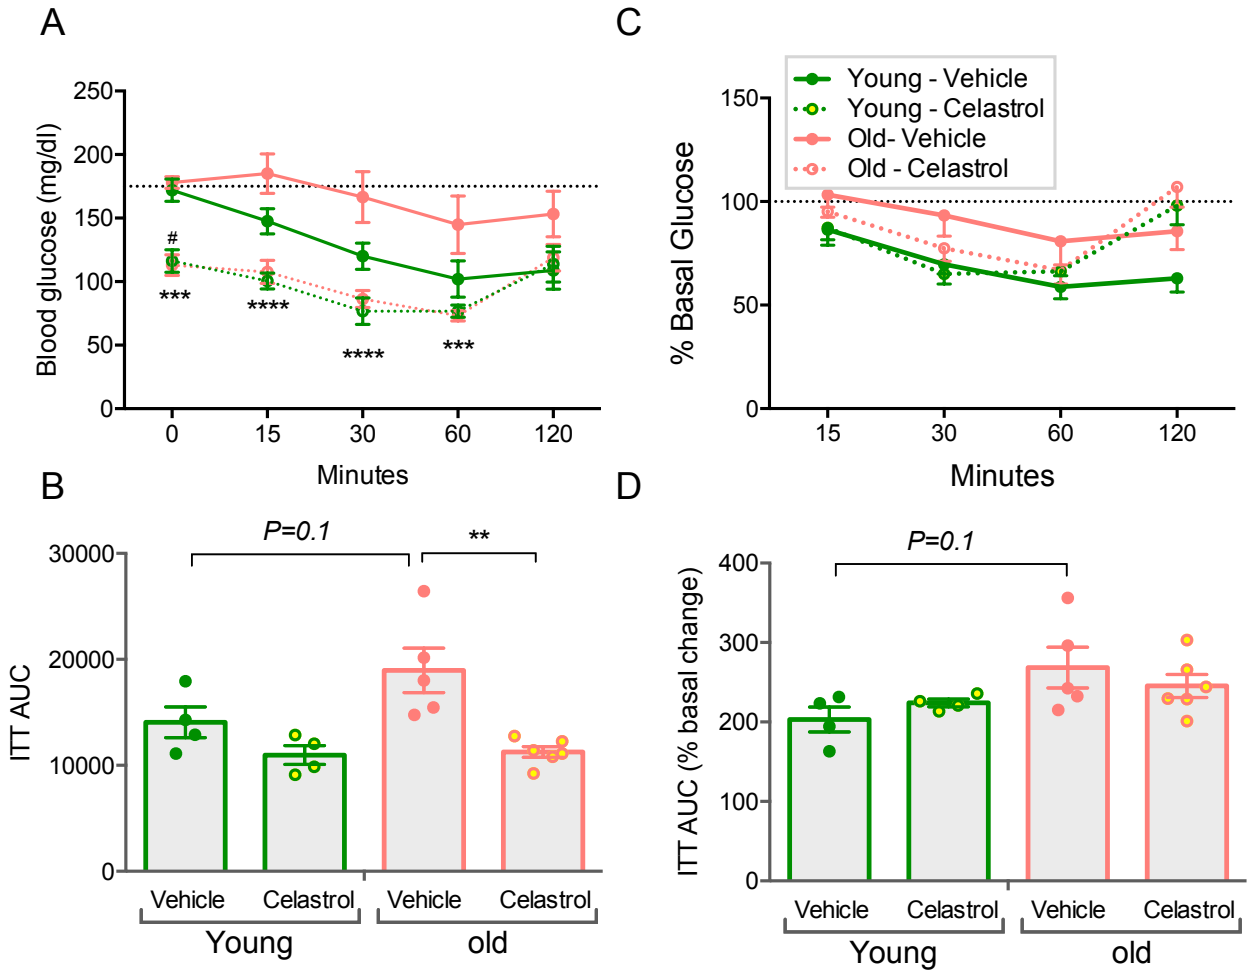

# Supplementary Figure 2. Effect of celastrol on food and water consumption

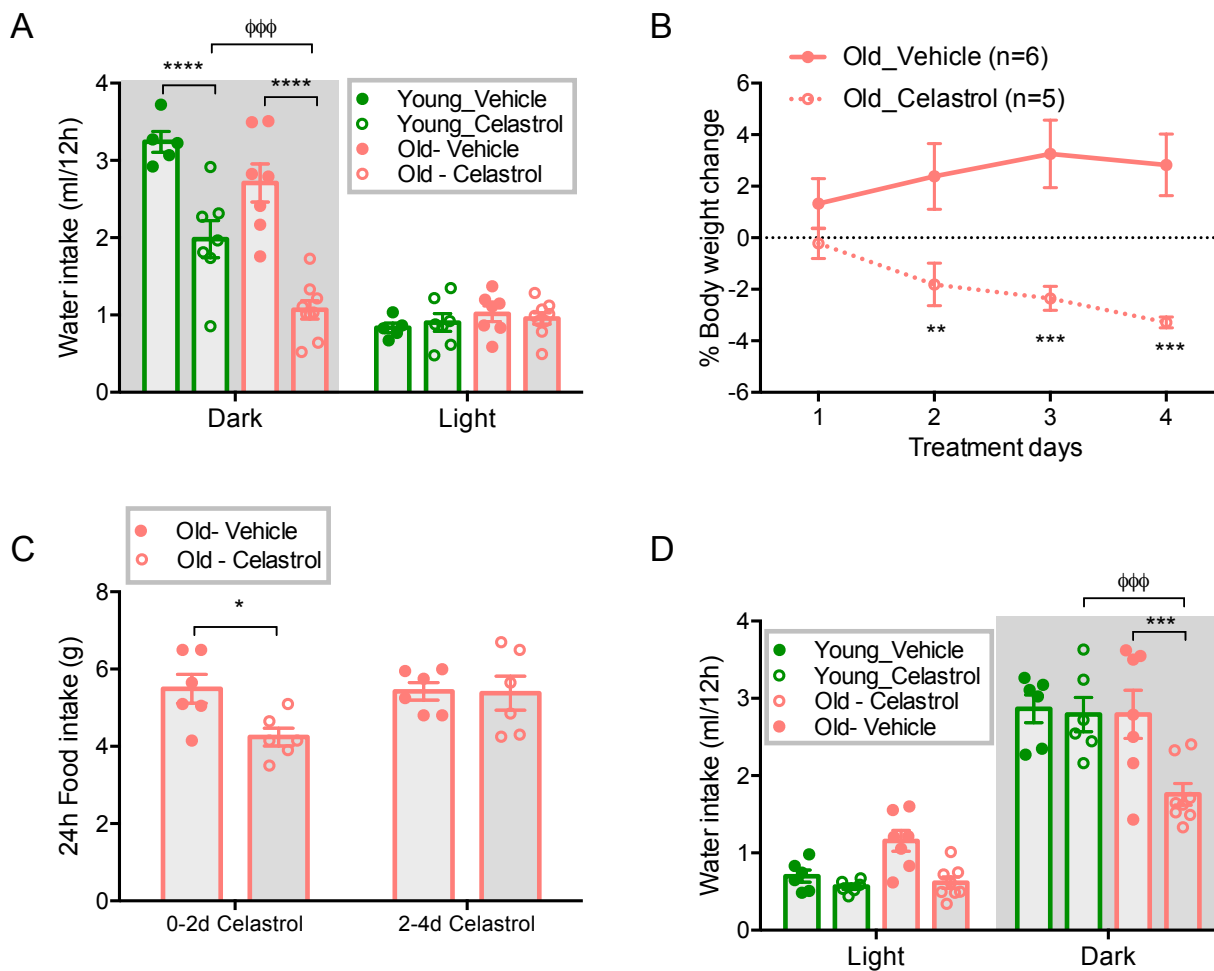

Supplement: ACEL-18-e12874-s001.pdf [file ACEL-18-e12874-s001.pdf]
